# Supplementary material for: Integrative solar absorbers for highly efficient solar steam generation
Source: Royal Society of Chemistry journal article supplement (doi:10.1039/c7ta08256h), 2017-12-21
Supplement: c7ta08256h1.pdf [file c7ta08256h1.pdf]

## Electronic Supplementary Information

### Integrative Solar Absorbers for Highly Efficient Solar Steam Generation

Xiaofeng Lin, Jiayao Chen, Zhongke Yuan, Meijia Yang, Guojian Chen, Dingshan Yu, Mingqiu Zhang, Wei Hong,\* and Xudong Chen\*

Key Laboratory for Polymeric Composite and Functional Materials of Ministry of Education,  
Guangdong Engineering Technology Research Center for High-performance Organic and Polymer Photoelectric Functional Films,  
School of Chemistry,  
Sun Yat-sen University,  
Guangzhou 510275, China  
E-mail: [hongwei9@mail.sysu.edu.cn](mailto:hongwei9@mail.sysu.edu.cn); [cesxcd@mail.sysu.edu.cn](mailto:cesxcd@mail.sysu.edu.cn)

### Calculation of porosity and density.

The porosity is provided as a fraction of the void volume in the total volume.<sup>S1</sup>

$$\Theta = \frac{V_{void}}{V_{total}} \times 100\% = 1 - \frac{V_{solid}}{V_{total}} \times 100\% \quad (1)$$

The  $V_{void}$  is volume of pores, the  $V_{solid}$  is volume of solid and the  $V_{total}$  is total volume of foam material including the solid and pore volume. The  $V_{total}$  of the cuboid foam can be expressed as  $V_{total} = a*b*c$ . The a, b and c represent the three dimensions of the foam, respectively. The  $V_{solid}$  can be expressed as  $V_{solid} = m/\rho_{solid}$ ; the m is the weight of foam and the  $\rho_{solid}$  is the solid density of foam materials. The  $\rho_{solid}$  of melamine obtained from business is about  $1.573 \text{ g}\cdot\text{cm}^{-3}$ . The  $\rho_{solid}$  of the ISA, which is carbonized at low temperature of 400-800 °C, is about  $1.6\text{-}1.8 \text{ g}\cdot\text{cm}^{-3}$  (between the pure melamine and carbon (ca.  $1.8 \text{ g}\cdot\text{cm}^{-3}$ )).<sup>S1</sup>

For example, a piece of unprocessed melamine foam (MF) with volume of 10.0 cm<sup>3</sup> (10.0 cm×6.0 cm×2.0 cm) weights 0.9626 g. Hence, the porosity can be calculated as:

$$1 - \frac{0.9626 \text{ g}}{1.573 \text{ g} \cdot \text{cm}^{-3} \times 10 \text{ cm}^3} \times 100\% = 99.49\%$$

The total density of the foam materials ( $\rho_{total}$ ) are calculated as ratio of foam weight ( $m$ ) to  $V_{total}$ ,

$$\rho_{total} = \frac{m}{V_{total}} \quad (2)$$

**Table S1.** Summary of various parameters for the unprocessed MF and integrative solar absorbers (ISAs).

| Samples        | Mass [g] | $V_{total}$ [cm <sup>3</sup> ] | $\rho_{total}$ [mg·cm <sup>-3</sup> ] | $\rho_{solid}$ [g·cm <sup>-3</sup> ] | $V_{solid}$ [cm <sup>3</sup> ] | Porosity [%] | Thermal conductivity [W·m <sup>-1</sup> ·k <sup>-1</sup> ] |
|----------------|----------|--------------------------------|---------------------------------------|--------------------------------------|--------------------------------|--------------|------------------------------------------------------------|
| Unprocessed MF | 0.9626   | 10<br>(10*6*2)                 | 8.022                                 | 1.573                                | 0.612                          | 99.49        | 0.03669                                                    |
| ISA-400        | 0.4520   | 61<br>(8*4.8*1.6)              | 7.356                                 | 1.6-1.8                              | 0.251-0.282                    | 99.54-99.59  | 0.03198                                                    |
| ISA-550        | 0.2518   | 33<br>(6.5*3.9*1.3)            | 7.641                                 | 1.6-1.8                              | 0.140-0.157                    | 99.52-99.58  | 0.02856                                                    |
| ISA-700        | 0.1233   | 15<br>(5*3*1)                  | 8.221                                 | 1.6-1.8                              | 0.068-0.077                    | 99.49-99.54  | 0.03022                                                    |

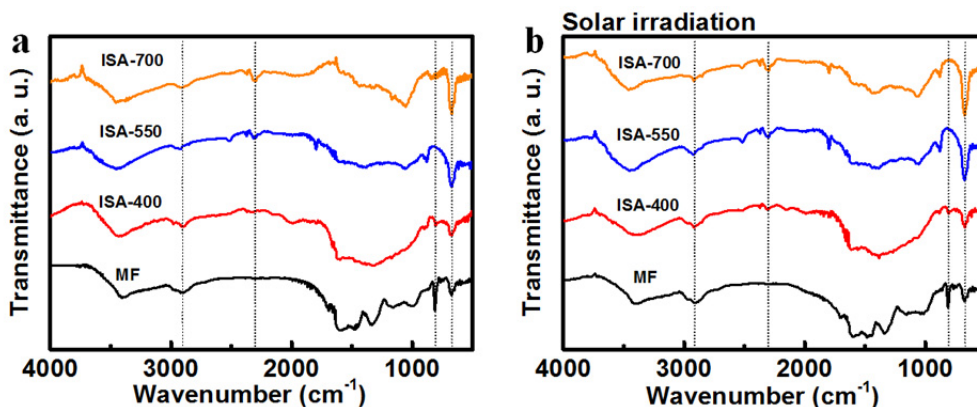

Fig. S1 The FTIR spectra of the unprocessed MF, ISA-400, ISA-550 and ISA-700 a) without and b) with solar irradiation.

Fig. S1 shows the FTIR spectra of the unprocessed MF and the ISAs at different temperatures. The spectrum of the unprocessed MF presents peaks at 880, 1602, 2930 and 3450  $\text{cm}^{-1}$  that were assigned to the triazine ring bending, C-N stretching in triazine ring, C-H stretching, and N-H, respectively. The peaks in the range 1300-1500  $\text{cm}^{-1}$  can either be attributed to the C-H bending, or to the C-N stretching modes of the s-triazine ring. The peaks in the 1050-1700  $\text{cm}^{-1}$  region disappeared when heating above 400  $^{\circ}\text{C}$  to form a very broad band. The intensity of the peak at 880  $\text{cm}^{-1}$  (s-triazine bending) gradually faded during the thermal treatment. This disappearance was in relation with the growth of the peaks in the 2230  $\text{cm}^{-1}$  range attributed to the  $\text{C}\equiv\text{N}$  stretching (or  $\text{C}\equiv\text{C}$ ), which indicated the thermal decomposition of the triazine ring. The intensity of the peak 2930  $\text{cm}^{-1}$  decreased during the thermal treatment, but still maintained a certain intensity, which indicated the existence of aliphatic carbon (polymeric chain).

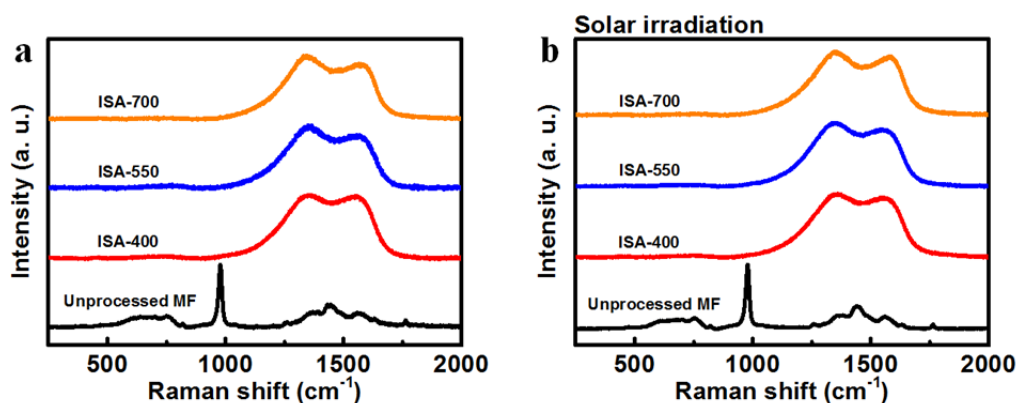

Fig. S2 The Raman spectra of the unprocessed MF, ISA-400, ISA-550 and ISA-700 a) without and b) with solar irradiation.

The Raman spectra (Fig. S2) of the unprocessed MF shows an intense peak at  $978\text{ cm}^{-1}$ , characteristic of the breathing modes of the triazine ring of melamine. Two Raman bands are characteristic of melamine:  $670\text{ cm}^{-1}$  and  $978\text{ cm}^{-1}$ . The first corresponds to the in-plane deformation vibrational mode and the second to the triazine ring breathing vibrational mode. Upon the pyrolysis temperature of  $400\text{ }^{\circ}\text{C}$ , the  $978\text{ cm}^{-1}$  peak vanished and two new peaks assigned to the carbon D-band ( $1343\text{-}1353\text{ cm}^{-1}$ ) and G-band ( $1550\text{-}1580\text{ cm}^{-1}$ ) appeared. The D-band corresponds to the disorder-induced due to breathing modes in rings, and, the G-band to the C-C stretching modes in both rings and chains. So, the ISAs were made of a  $\text{sp}^2$  carbon network. The decrease of the width of the D-band and G-band were also observed with the increase of the pyrolysis temperature, which constitutes a signature of the carbonization process.

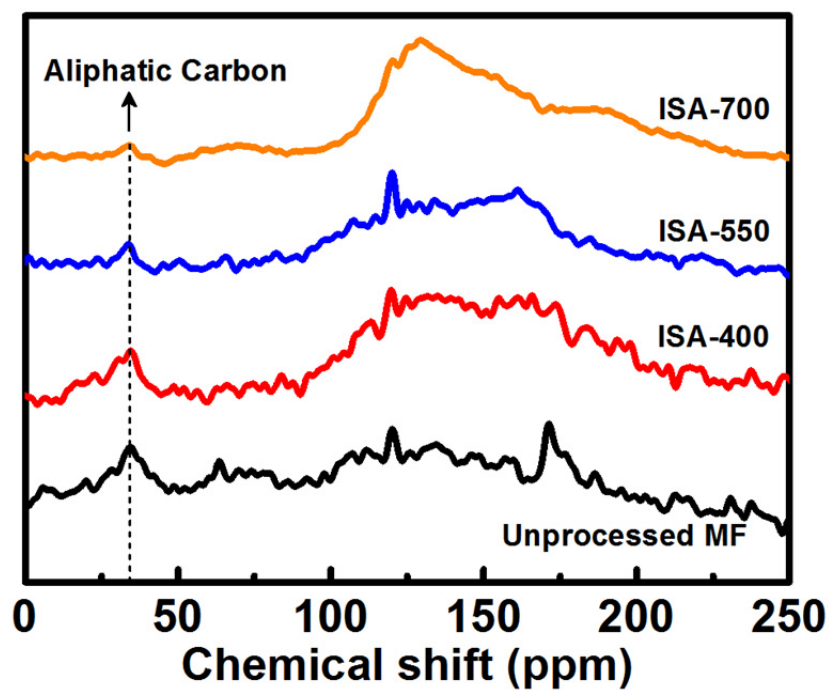

Fig. S3 The  $^{13}\text{C}$  solid state CP-MAS NMR spectra of unprocessed MF, ISA-400, ISA-550 and ISA-700. The  $^{13}\text{C}$  solid state CP-MAS NMR spectra exhibits the peaks at 34.5 ppm, which assigned to the aliphatic carbon.

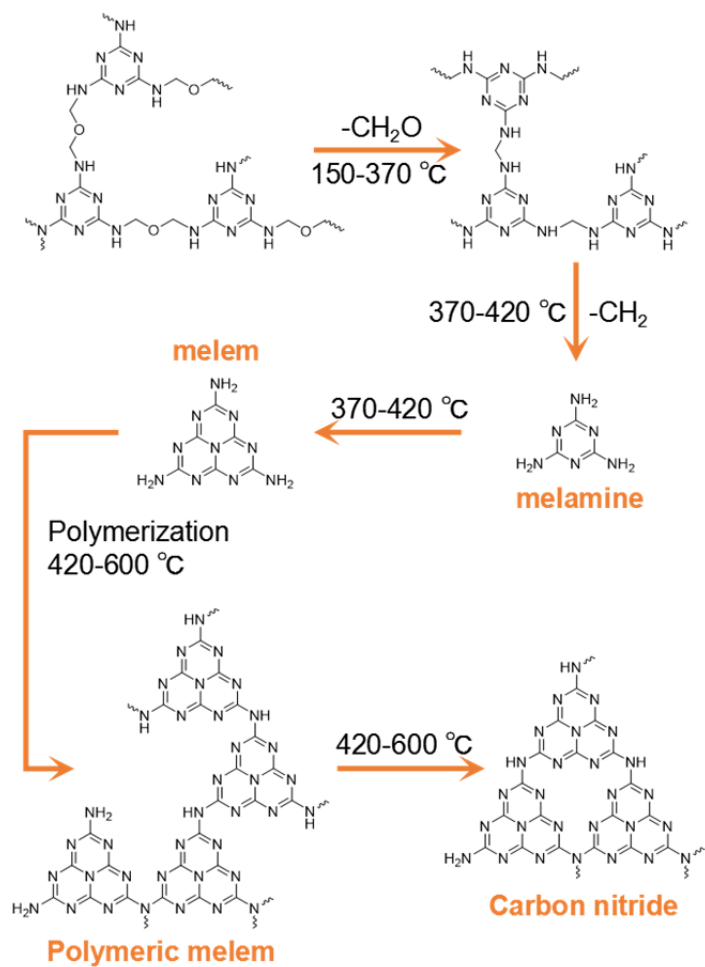

**Fig. S4** The possible formation mechanism of the ISA via the calcination process under the nitrogen atmosphere.

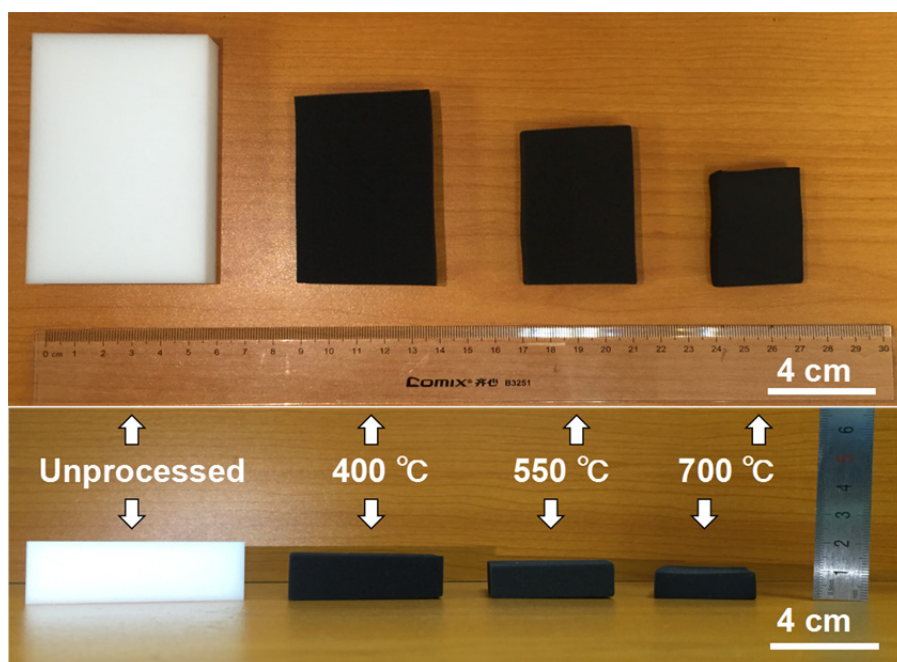

**Fig. S5** The photographs of unprocessed MF (10.0 cm×6.0 cm×2.0 cm), ISA-400 (8.0 cm×4.8 cm×1.6 cm), ISA-550 (6.5 cm×3.9 cm×1.3 cm) and ISA-700 (5.0 cm×3.0 cm×1.0 cm).

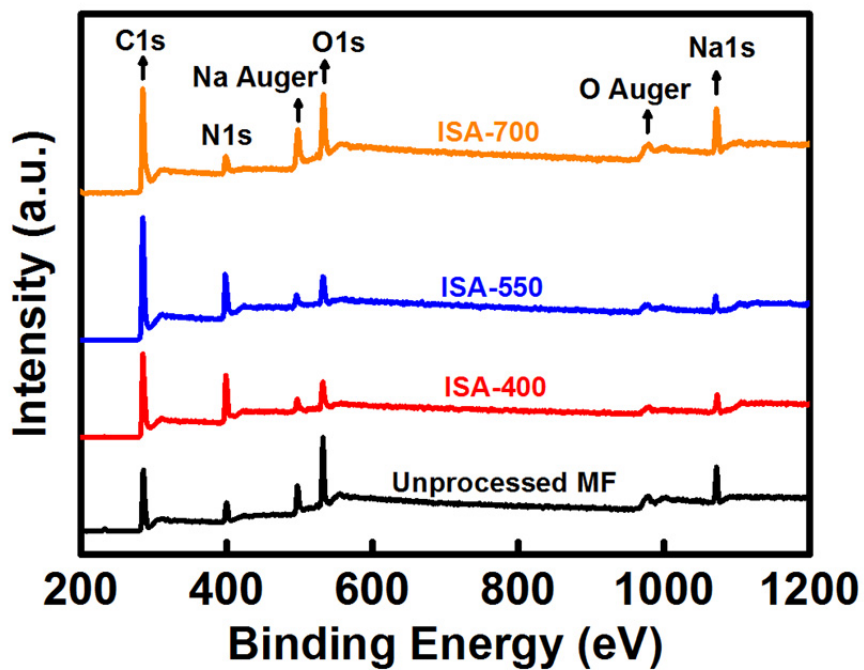

**Fig. S6** Full-range XPS spectra of the unprocessed MF, ISA-400, ISA-550 and ISA-700.



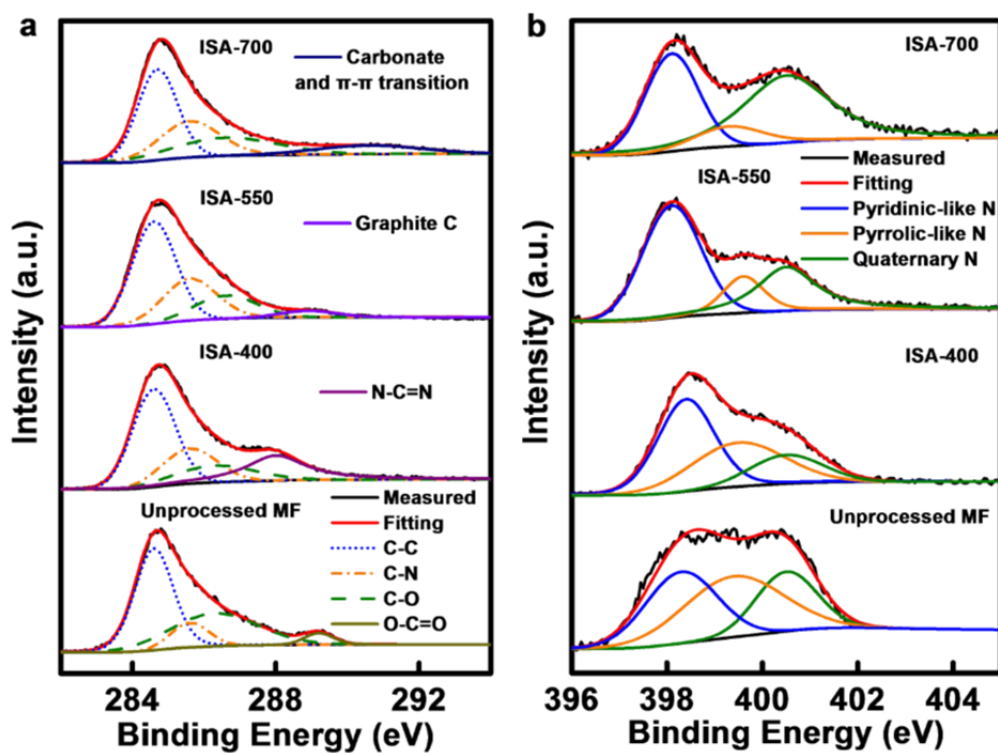

**Fig. S7** a) C 1s XPS spectra of the unprocessed MF, ISA-400, ISA-550 and ISA-700.  
 b) N 1s XPS spectra of unprocessed MF, ISA-400, ISA-550 and ISA-700. The C 1s and N 1s spectra were decomposed to several peaks that were fitted by the Gaussian function.

**Table S2.** The results of elemental analysis for unprocessed MF, ISA-400, ISA-550 and ISA-700.

| Samples        | C (wt %) | H (wt %) | N (wt %) | C/N ratio |
|----------------|----------|----------|----------|-----------|
| Unprocessed MF | 35.27    | 4.095    | 43.78    | 0.806     |
| ISA-400        | 45.59    | 2.353    | 39.03    | 1.168     |
| ISA-550        | 49.40    | 1.694    | 32.62    | 1.514     |
| ISA-700        | 51.61    | 1.495    | 24.04    | 2.147     |

**Table S3.** The percentage of pyridinic-like N, pyrrolic-like N and quaternary N nitrogen in nitrogen from XPS for unprocessed MF, ISA-400, ISA-550 and ISA-700.

| Samples        | Pyridinic-like N (%) | Pyrrolic-like N (%) | Quaternary N (%) |
|----------------|----------------------|---------------------|------------------|
| Unprocessed MF | 34.75                | 40.65               | 24.60            |
| ISA-400        | 47.67                | 34.63               | 17.70            |
| ISA-550        | 56.08                | 14.59               | 29.32            |
| ISA-700        | 37.72                | 10.37               | 51.91            |

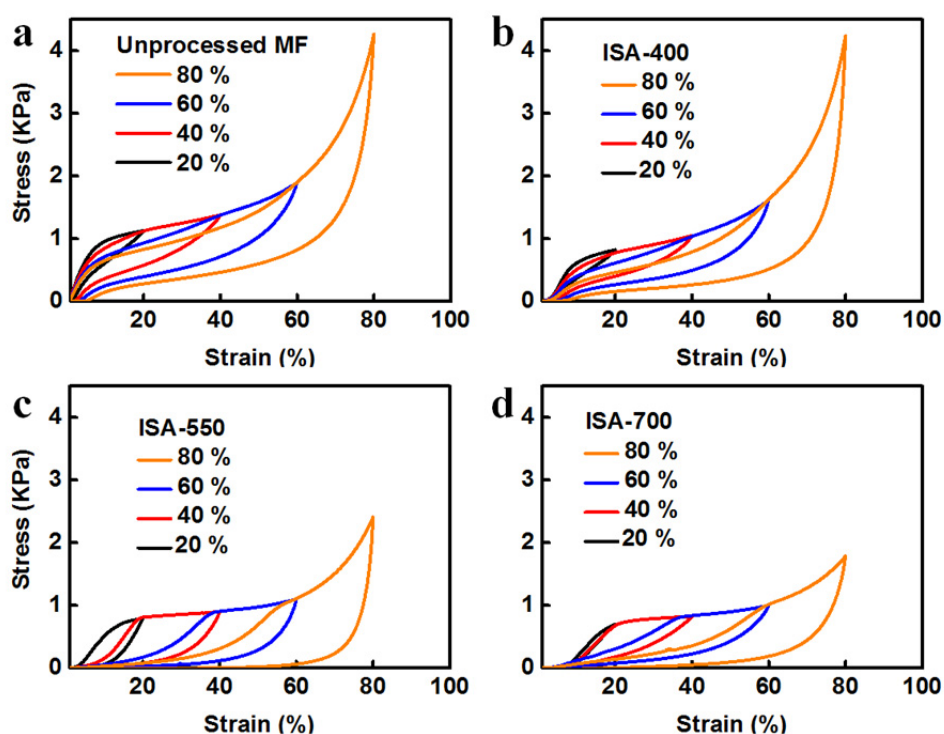

**Fig. S8** The stress–strain curves of a) unprocessed MF, b) ISA-400, c) ISA-550 and d) ISA-700 at different strain of 20 %, 40 %, 60 % and 80 %, respectively. For tensile test, the 1 cm thick samples (unprocessed MF or various ISAs) were cut into 3 cm × 3 cm for tensile test, and the strain rate is 20 % per minute.

**Table S4.** The maximum stress of unprocessed MF, ISA-400, ISA-550 and ISA-700 at different strain of 20 %, 40 %, 60 % and 80 %, respectively.

| Samples<br>Stress (KPa)<br>Strain(%) | 20    | 40    | 60    | 80    |
|--------------------------------------|-------|-------|-------|-------|
| Unprocessed MF                       | 1.129 | 1.380 | 1.898 | 4.268 |
| ISA-400                              | 0.824 | 1.049 | 1.616 | 4.237 |
| ISA-550                              | 0.795 | 0.897 | 1.103 | 2.410 |
| ISA-700                              | 0.699 | 0.829 | 1.003 | 1.786 |

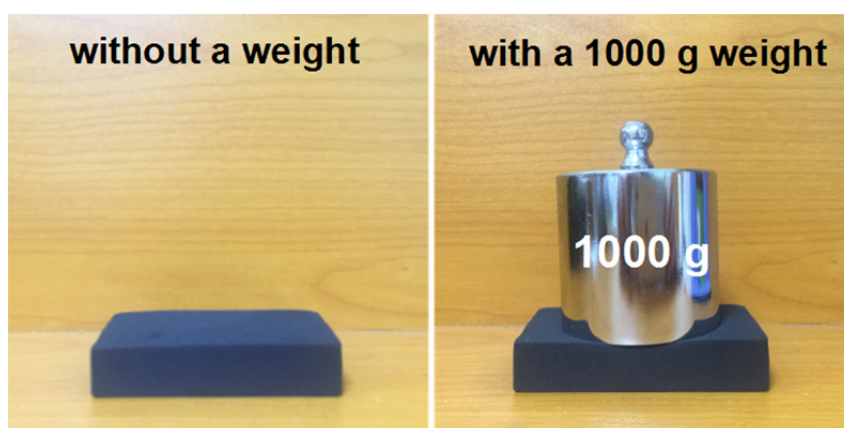

**Fig. S9** The photographs of ISA-550 showing its mechanical robustness that can support a 1000 g weight with little compressive deformation.

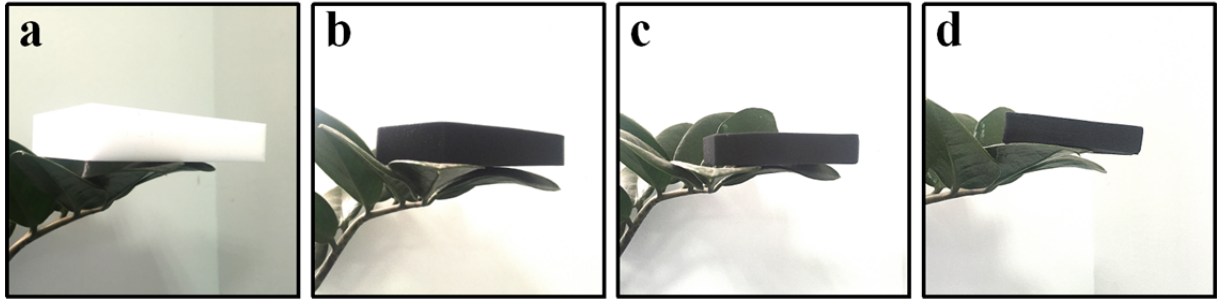

**Fig. S10** The photographs of a) unprocessed MF, b) ISA-400, c) ISA-550 and d) ISA-700 showing that they can be lightly put on a cinnamon leaf without any deformation of the leaf.

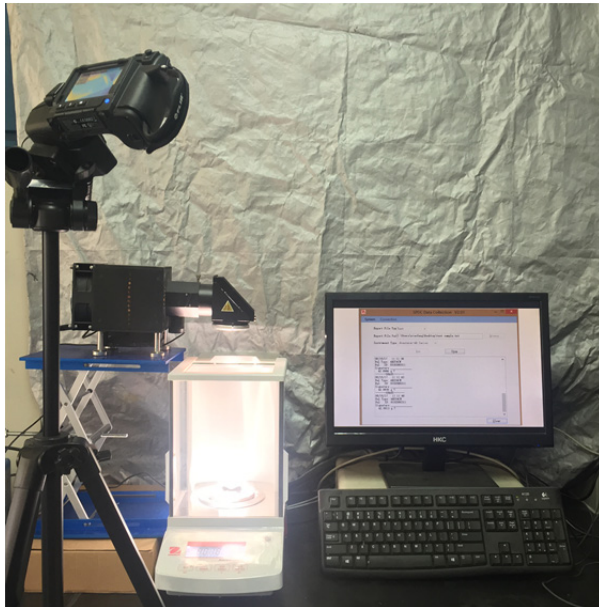

**Fig. S11** The photograph of the test system for energy conversion efficiency ( $\eta_{ECE}$ ).

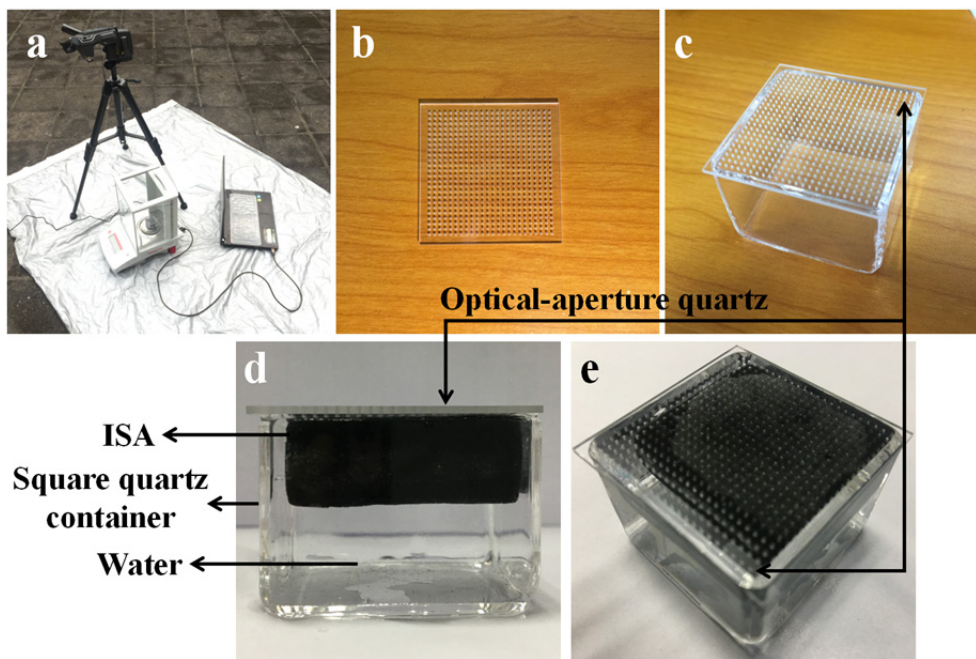

**Fig. S12** The photographs of a) the test system under the natural sunlight, b) optical-aperture quartz, c) a square quartz container with a quartz cover, d) and e) the ISA in the square quartz container with a holey quartz cover. The holey quartz cover was used to prevent the impact from the airflow and the light intensity was measured under the quartz cover. In addition, the square quartz container was used to fit the size of ISAs to prevent the redundant bare water.

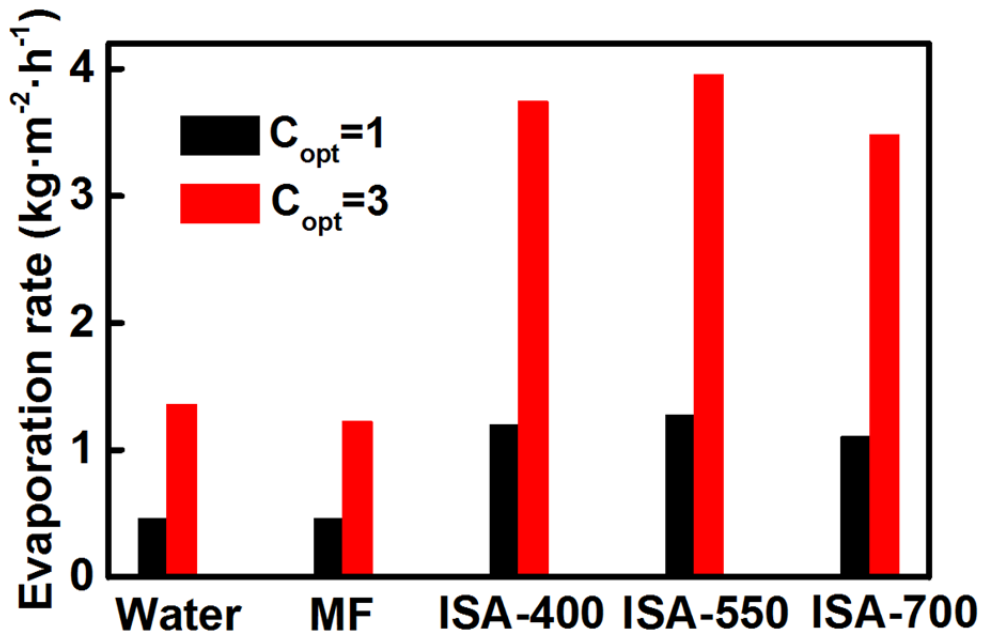

Fig. S13 The bar chart of the water evaporation rates with corresponding samples under 1 sun (black bars) and 3 sun illumination (red bars).

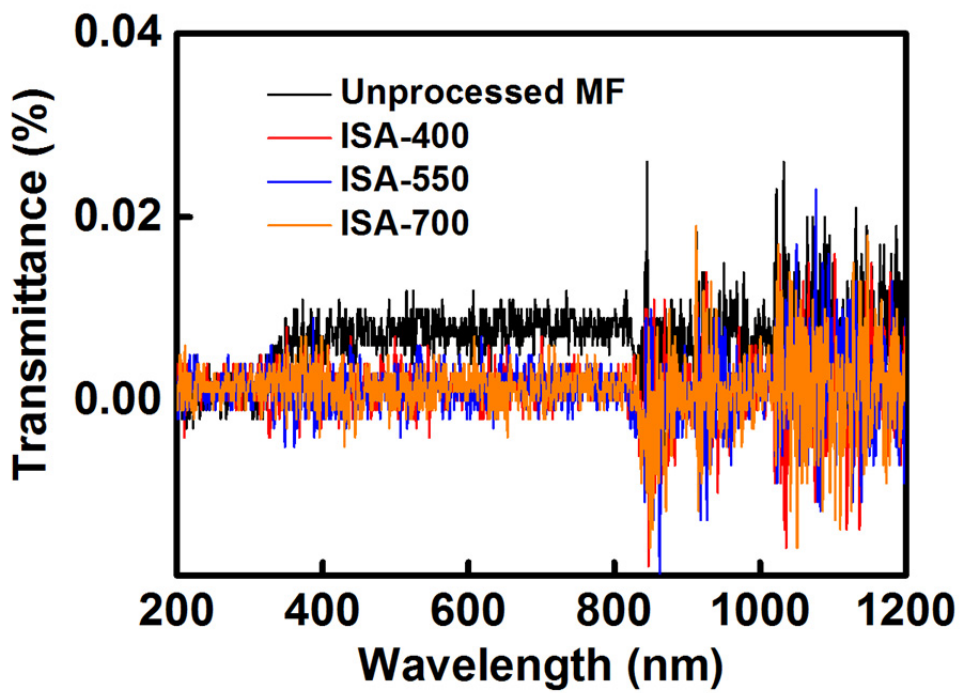

**Fig. S14** The transmittance spectra of unprocessed MF, ISA-400, ISA-550 and ISA-700.

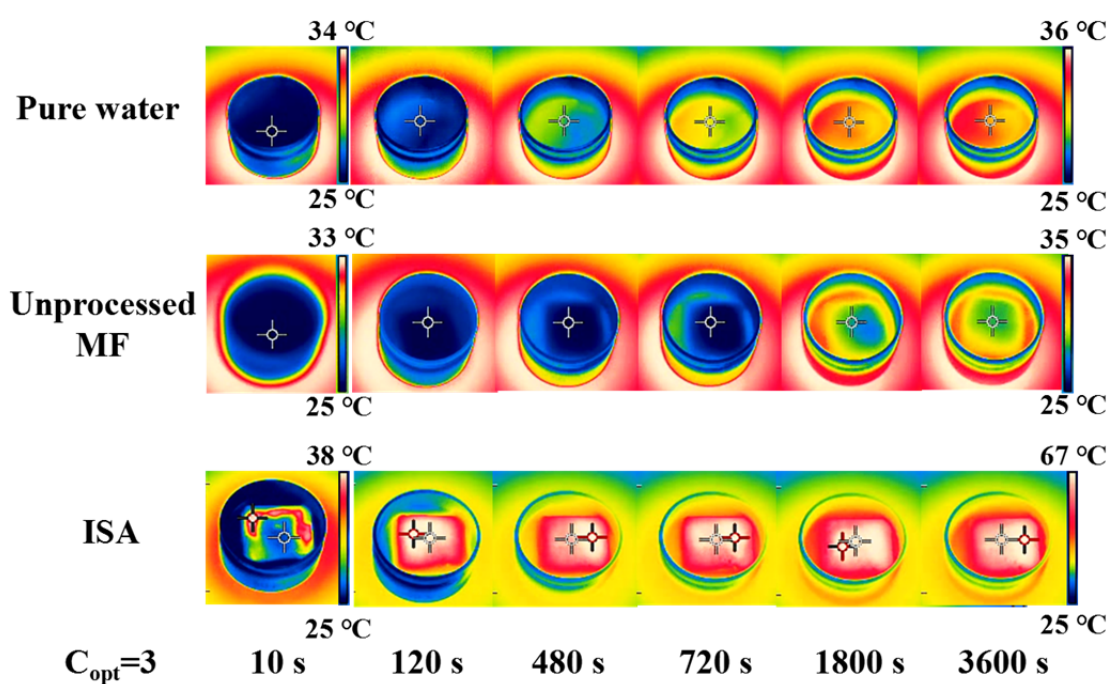

**Fig. S15** IR images of the pure water, unprocessed MF and ISA (with water immersion) under solar illumination with a power density of  $3 \text{ kW}\cdot\text{m}^{-2}$ . The images of sequence from left to right are corresponding to  $t= 10 \text{ s}$ ,  $120 \text{ s}$ ,  $280 \text{ s}$ ,  $720 \text{ s}$ ,  $1800 \text{ s}$  and  $3600 \text{ s}$ , respectively.

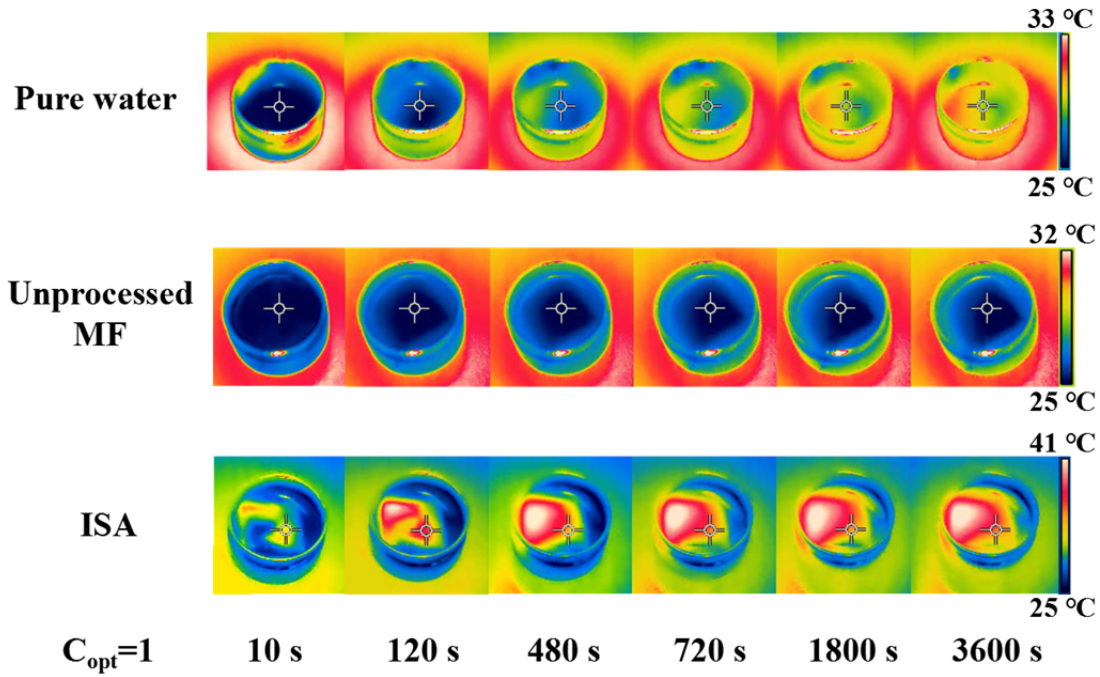

**Fig. S16** IR images of the pure water, unprocessed MF and ISA (with water immersion) under solar illumination with a power density of  $1 \text{ kW}\cdot\text{m}^{-2}$ . The images of sequence from left to right are corresponding to  $t= 10 \text{ s}$ ,  $120 \text{ s}$ ,  $280 \text{ s}$ ,  $720 \text{ s}$ ,  $1800 \text{ s}$  and  $3600 \text{ s}$ , respectively.

**Table S5.** Calculation results of the energy conversion efficiency ( $\eta_{ECE}$ ).

| $C_{\text{opt}}$ | Evaporation rate of Pure water ( $\text{kg}\cdot\text{m}^{-2}\cdot\text{h}^{-1}$ ) | $\dot{m}$ ( $\text{kg}\cdot\text{m}^{-2}\cdot\text{h}^{-1}$ ) | Temperature T ( $^{\circ}\text{C}$ ) | $C \times (T - T_0)$ ( $\text{kJ}\cdot\text{kg}^{-1}$ ) | $\Delta h_{\text{vap}}$ ( $\text{kJ}\cdot\text{kg}^{-1}$ ) | $\eta_{ECE}(\%)^a$ | $\eta_{ECE}'(\%)^b$ |
|------------------|------------------------------------------------------------------------------------|---------------------------------------------------------------|--------------------------------------|---------------------------------------------------------|------------------------------------------------------------|--------------------|---------------------|
| 1                | 0.462                                                                              | 1.270                                                         | 43.2                                 | 76.1                                                    | 2398.3                                                     | 87.3               | 82.3                |
| 2                | 0.996                                                                              | 2.595                                                         | 58.0                                 | 137.9                                                   | 2362.2                                                     | 90.1               | 86.2                |
| 3                | 1.358                                                                              | 3.951                                                         | 66.6                                 | 173.9                                                   | 2341.1                                                     | 92.0               | 88.8                |
| 4                | 1.864                                                                              | 5.332                                                         | 69.1                                 | 184.38                                                  | 2335.3                                                     | 93.3               | 90.3                |
| 6                | 2.877                                                                              | 8.099                                                         | 72.5                                 | 198.6                                                   | 2327.0                                                     | 94.7               | 92.0                |

a The calculating energy conversion efficiency based on  $h_{LV} = C \times (T - T_0) + \Delta h_{\text{vap}}$

b The calculating energy conversion efficiency based on  $h_{LV} = 2260 \text{ kJ}\cdot\text{kg}^{-1}$

The equation for calculating energy conversion efficiency is  $\eta_{ECE} = \dot{m}h_{LV}/C_{\text{opt}}P_0$ .

Among the variable parameters, the total enthalpy of liquid-vapor phase change ( $h_{LV}$ )



contains two parts, which is the sensible heat and the enthalpy of vaporization ( $h_{LV} = C \times (T - T_0) + \Delta h_{vap}$ ).  $T_0$  is the initial temperature of water (25 °C).  $T$  is the vapor temperature measured by the IR camera (details in Table S5). In the temperature ranging from 40 to 75 °C, the value of  $C$  (specific heat capacity of water) is considered as a constant of  $4.18 \text{ J}\cdot\text{g}^{-1}\cdot\text{K}^{-1}$ . Meanwhile,  $\Delta h_{vap}$  (the enthalpy of vaporization) is dependent on the temperature, which can be searched from the specialized database.<sup>S2,S3</sup>

Another calculation way of energy conversion efficiency is based on the  $h_{LV} = 2260 \text{ kJ}\cdot\text{kg}^{-1}$ , which was indicated by some former literatures (Adv. Mater. 2015, 27, 4889–4894; ACS Appl. Mater. Interfaces 2016, 8, 9194; ACS Sustain. Chem. Eng. 2016, 4, 1223-1230; ACS Appl. Mater. Interfaces 2016, 8, 31716-31721; J. Mater. Chem. A, 2017, 5, 16212–16219.) For the factor of  $\dot{m}$  and  $P_{in}$ , it should be noted that the experimental error could occur, including measurement errors of light intensity, the stability of light with long term irradiation, the impact from airflow, ambient temperature and humidity.

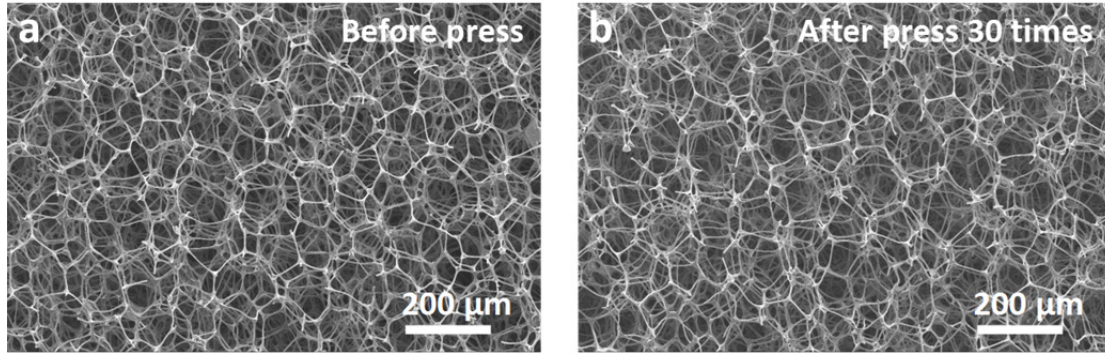

**Fig. S17** The SEM images of ISA-550 a) without and b) with pressing 30 times.

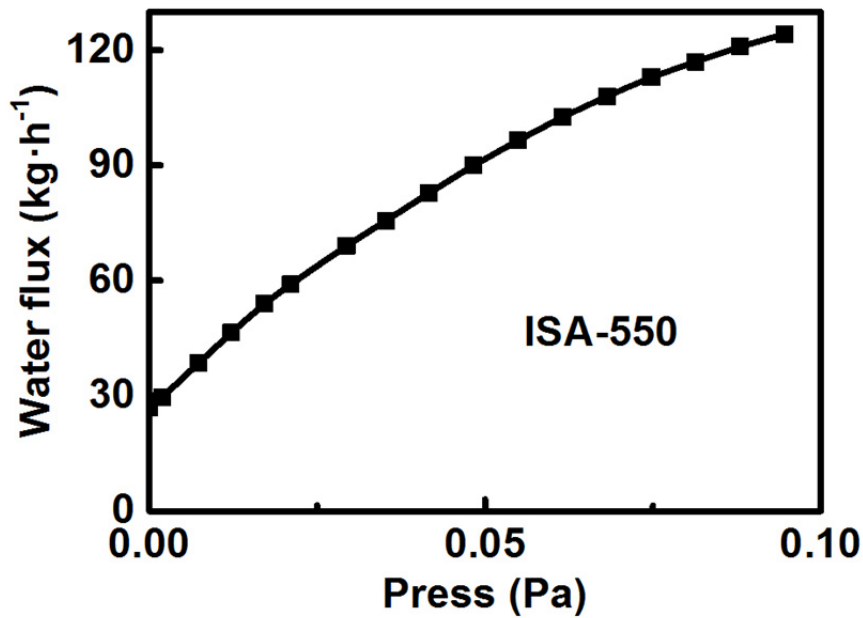

**Fig. S18** The water flux–press curves of ISA-550. The intrinsic water flux of ISA-550 has reached up to 27 kg·h<sup>-1</sup>.

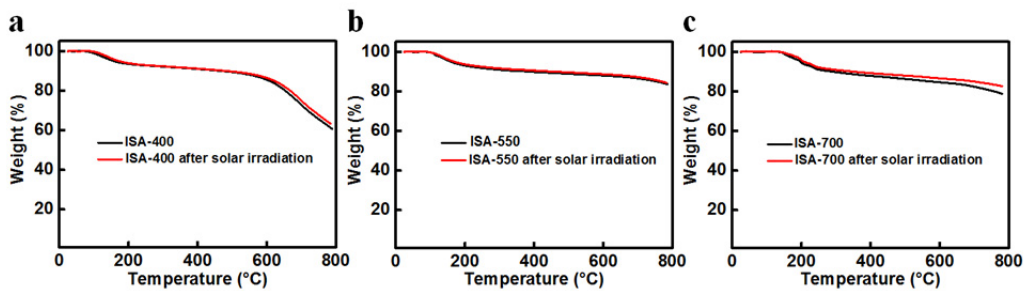

**Fig. S19** The TGA curves of the a) ISA-400, b) ISA-550 and c) ISA-700 without and with solar irradiation, under N<sub>2</sub> with a ramp of 5 °C·min<sup>-1</sup> from 30 to 800 °C.

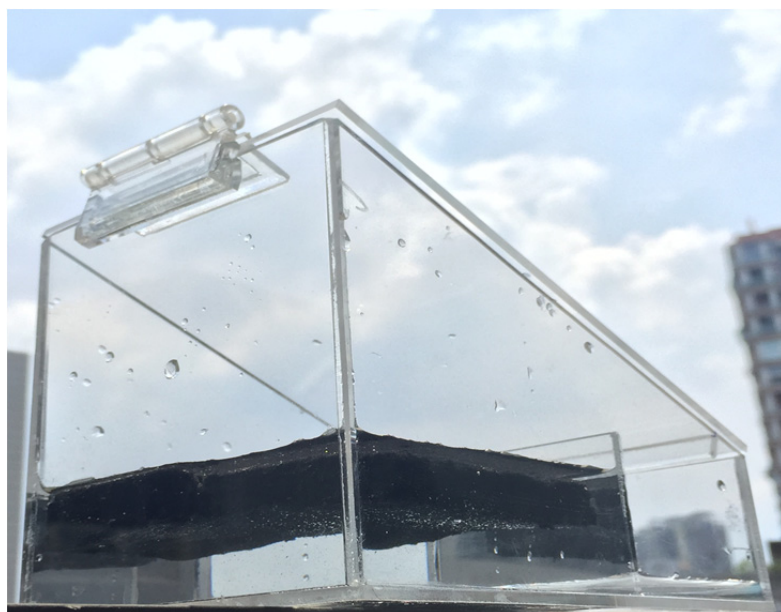

**Fig. S20** The photograph of the homemade device for desalination under the natural sunlight.

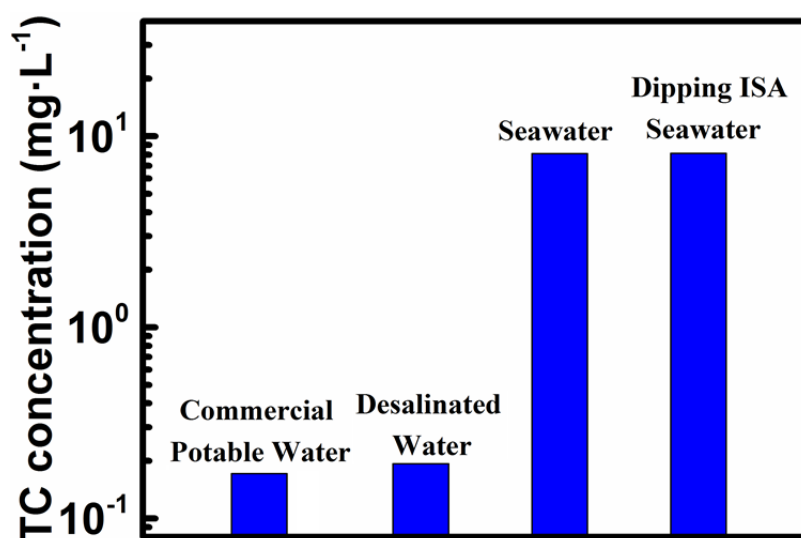

**Fig. S21** The total carbon concentration in commercial potable water, desalinated water, seawater and seawater with ISAs dipping in during solar irradiation .

As shown in the figure above, the seawater with ISAs dipping in during solar irradiation exhibits similar total carbon concentration with the original seawater. The desalinated water we obtained has total carbon concentration comparable with the commercial potable water (Cestbon, purified drinking water).

**Table S6.** The concentrations of Na<sup>+</sup>, K<sup>+</sup>, Ca<sup>2+</sup> and Mg<sup>2+</sup> of the seawater and the desalinated water measured by ICP-AES.

| Ions              | Na <sup>+</sup> [mg·L <sup>-1</sup> ] | K <sup>+</sup> [mg·L <sup>-1</sup> ] | Ca <sup>2+</sup> [mg·L <sup>-1</sup> ] | Mg <sup>2+</sup> [mg·L <sup>-1</sup> ] | Cl <sup>-</sup> [mg·L <sup>-1</sup> ] | SO <sub>4</sub> <sup>2-</sup> [mg·L <sup>-1</sup> ] |
|-------------------|---------------------------------------|--------------------------------------|----------------------------------------|----------------------------------------|---------------------------------------|-----------------------------------------------------|
| Seawater          | 10588                                 | 393                                  | 482                                    | 1132                                   | 19670                                 | 2610                                                |
| Desalinated water | 2.78                                  | Lower than the detection limit       | 0.86                                   | 0.07                                   | 0.04                                  | 0.05                                                |

**Table S7.** Summary of recent reports about the water evaporation rate under different solar illumination and thermal conductivities of various solar absorbers.

| Author (year)          | Material of solar absorber                                          | Water evaporation rate under corresponding solar illumination (kg·m <sup>-2</sup> ·h <sup>-1</sup> ) |                      |                          | Thermal conductivity (W·m <sup>-1</sup> ·K <sup>-1</sup> ) | Room temperature (°C) | Humidity (%) |
|------------------------|---------------------------------------------------------------------|------------------------------------------------------------------------------------------------------|----------------------|--------------------------|------------------------------------------------------------|-----------------------|--------------|
|                        |                                                                     | 1 kW·m <sup>-2</sup>                                                                                 | 2 kW·m <sup>-2</sup> | 3/3.5 kW·m <sup>-2</sup> |                                                            |                       |              |
| H. Ghasemi (2014) [S4] | Carbon foam supporting graphite                                     | 1.0                                                                                                  | 2.0                  | 3.0                      | 0.117-0.309                                                | 24                    | 31           |
| Y. ITO (2015) [S5]     | Multifunctional Porous Graphene                                     | 1.5                                                                                                  | -                    | -                        | 9                                                          | 24                    | 14           |
| J. Lou (2016) [S6]     | Paper-Based rGO Composites                                          | -                                                                                                    | -                    | 2.8                      | 0.05                                                       | -                     | .-           |
| X. Wang (2016) [S7]    | rGO-supported Fe <sub>3</sub> O <sub>4</sub> magnetic nanoparticles | 1.12                                                                                                 | 2.25                 | -                        | -                                                          | 32                    | 30           |

|                                 |                                                 |              |              |              |              |           |           |
|---------------------------------|-------------------------------------------------|--------------|--------------|--------------|--------------|-----------|-----------|
| L. Zhou (2016) <sup>[S8]</sup>  | Aluminium-based plasmonic structure             | 1.0          | 2.3          | 3.8          | -            | 24        | 48        |
| L. Zhou (2016) <sup>[S9]</sup>  | Plasmonic absorbers                             | 1.2          | 2.2          | 3.7          | -            | 24        | 42        |
| X. Hu (2017) <sup>[S10]</sup>   | Graphene oxide-based aerogels                   | 1.622        | -            | -            | 0.05         | 25        | 45        |
| Z. Liu (2017) <sup>[S3]</sup>   | Polystyrene foam supporting carbon-coated paper | 1.28         | -            | 3.66         | 0.04         | 21        | 10        |
| X. Wang (2017) <sup>[S11]</sup> | Plasmonic membranes                             | 0.87         | 2.2          | 3.5          | -            | 18        | -         |
| C. Chen (2017) <sup>[S12]</sup> | Carbon nanotube-modified flexible wood membrane | 0.95         | -            | 2.88         | 0.21         | -         | -         |
| <b>This Work</b>                | <b>ISAs</b>                                     | <b>1.270</b> | <b>2.595</b> | <b>3.951</b> | <b>0.028</b> | <b>25</b> | <b>50</b> |

**Table S8.** Summary of recent reports about the energy conversion efficiency under different solar illumination of various solar absorbers.

| Author (year)                     | Material of solar absorber                                          | Energy conversion efficiency under corresponding solar illumination (%) |                      |                          | Room temperature (°C) | Humidity (%) |
|-----------------------------------|---------------------------------------------------------------------|-------------------------------------------------------------------------|----------------------|--------------------------|-----------------------|--------------|
|                                   |                                                                     | 1 kW·m <sup>-2</sup>                                                    | 2 kW·m <sup>-2</sup> | 3/3.5 kW·m <sup>-2</sup> |                       |              |
| H. Ghasemi (2014) <sup>[S4]</sup> | Carbon foam supporting graphite                                     | 64                                                                      | 63                   | 65                       | 24                    | 31           |
| Y. ITO (2015) <sup>[S5]</sup>     | Multifunctional Porous Graphene                                     | 80                                                                      | -                    | -                        | 24                    | 14           |
| X. Wang (2016) <sup>[S7]</sup>    | rGO-supported Fe <sub>3</sub> O <sub>4</sub> magnetic nanoparticles | 68                                                                      | 70                   | -                        | 32                    | 30           |
| L. Zhou (2016) <sup>[S8]</sup>    | Aluminium-based plasmonic structure                                 | 57                                                                      | 71                   | 78                       | 24                    | 48           |

|                            |                                                              |             |             |           |           |           |
|----------------------------|--------------------------------------------------------------|-------------|-------------|-----------|-----------|-----------|
| L. Zhou<br>(2016)<br>[S19] | Plasmonic<br>absorbers                                       | 63          | 73          | 80        | 24        | 42        |
| X. Hu<br>(2017)<br>[S10]   | Graphene<br>oxide-based<br>aerogels                          | 83          | -           | -         | 25        | 45        |
| Z. Liu<br>(2017)<br>[S3]   | Polystyrene<br>foam supporting<br>carbon-coated<br>paper     | 88.6        | -           | 85.5      | 21        | 10        |
| X. Wang<br>(2017)<br>[S11] | Plasmonic<br>membranes                                       | 62.5        | 61          | 62        | 18        | -         |
| C. Chen<br>(2017)<br>[S12] | Carbon<br>nanotube<br>-modified<br>flexible wood<br>membrane | 65          | -           | 67        | -         | -         |
| <b>This<br/>Work</b>       | <b>ISAs</b>                                                  | <b>87.3</b> | <b>90.1</b> | <b>92</b> | <b>25</b> | <b>50</b> |

---

S1 S. Chen, G. He, H. Hu, S. Jin, Y. Zhou, Y. He, S. He, F. Zhao, H. Hou, *Energy*

*Environ. Sci.* 2013, **6**, 2435.

S2 Dortmund Data Bank Software & Separation Technology, DDBST GmbH,  
Oldenburg 2016.

S3 Z. Liu, H. Song, D. Ji, C. Li, A. Cheney, Y. Liu, N. Zhang, X. Zeng, B. Chen, J.  
Gao, Y. Li, X. Liu, D. Aga, S. Jiang, Z. Yu, Q. Gan, *Global Challenge* 2017, **1**,  
1600003.

S4 H. Ghasemi, G. Ni, A. M. Marconnet, J. Loomis, S. Yerci, N. Miljkovic, G. Chen,  
*Nat. Commun.* 2014, **5**, 4449.

S5 Y. Ito, Y. Tanabe, J. H. Han, T. Fujita, K. Tanigaki, M. Chen, *Adv. Mater.* 2015,  
**27**, 4302.

- S6 J. Lou, Y. Liu, Z. Wang, D. Zhao, C. Song, J. Wu, N. Dasgupta, W. Zhang, D. Zhang, P. Tao, W. Shang, T. Deng, *ACS Appl. Mater. Interfaces* 2016, **8**, 14628.
- S7 X. Wang, G. Ou, N. Wang, H. Wu, *ACS Appl. Mater. Interfaces* 2016, **8**, 9194.
- S8 L. Zhou, Y. Tan, J. Wang, W. Xu, Y. Yuan, W. Cai, S. Zhu, J. Zhu, *Nat. Photonics* 2016, **10**, 393.
- S9 L. Zhou, Y. Tan, D. Ji, B. Zhu, P. Zhang, J. Xu, Q. Gan, Z. Yu, J. Zhu, *Sci. Adv.* 2016, **2**, e1501227.
- S10 X. Hu, W. Xu, L. Zhou, Y. Tan, Y. Wang, S. Zhu, J. Zhu, *Adv. Mater.* 2017, **29**, 1604031.
- S11 X. Wang, Y. He, X. Liu, G. Cheng, J. Zhu, *Applied Energy* 2017, **195**, 414.
- S12 C. Chen, Y. Li, J. Song, Z. Yang, Y. Kuang, E. Hitz, C. Jia, A. Gong, F. Jiang, J. Y. Zhu, B. Yang, J. Xie, L. Hu, *Adv. Mater.* 2017, 1701756.
